# Supplementary material
Source: PubMed Central journal article supplement (PMC4179963)
Supplement: rna-11-891-s01.pdf [file rna-11-891-s01.pdf]

## **Supplemental Material to:**

**Agnel Joseph, Prasanna Bhat, Saumitra Das,  
Narayanaswamy Srinivasan**

**Re-analysis of cryoEM data on HCV IRES bound to 40S  
subunit of human ribosome integrated with recent  
structural information suggests new contact regions  
between ribosomal proteins and HCV RNA**

**2014; 11(7)**

**<http://dx.doi.org/10.4161/rna.29545>**

**[www.landesbioscience.com/journals/rnabiology/article/29545/](http://www.landesbioscience.com/journals/rnabiology/article/29545/)**

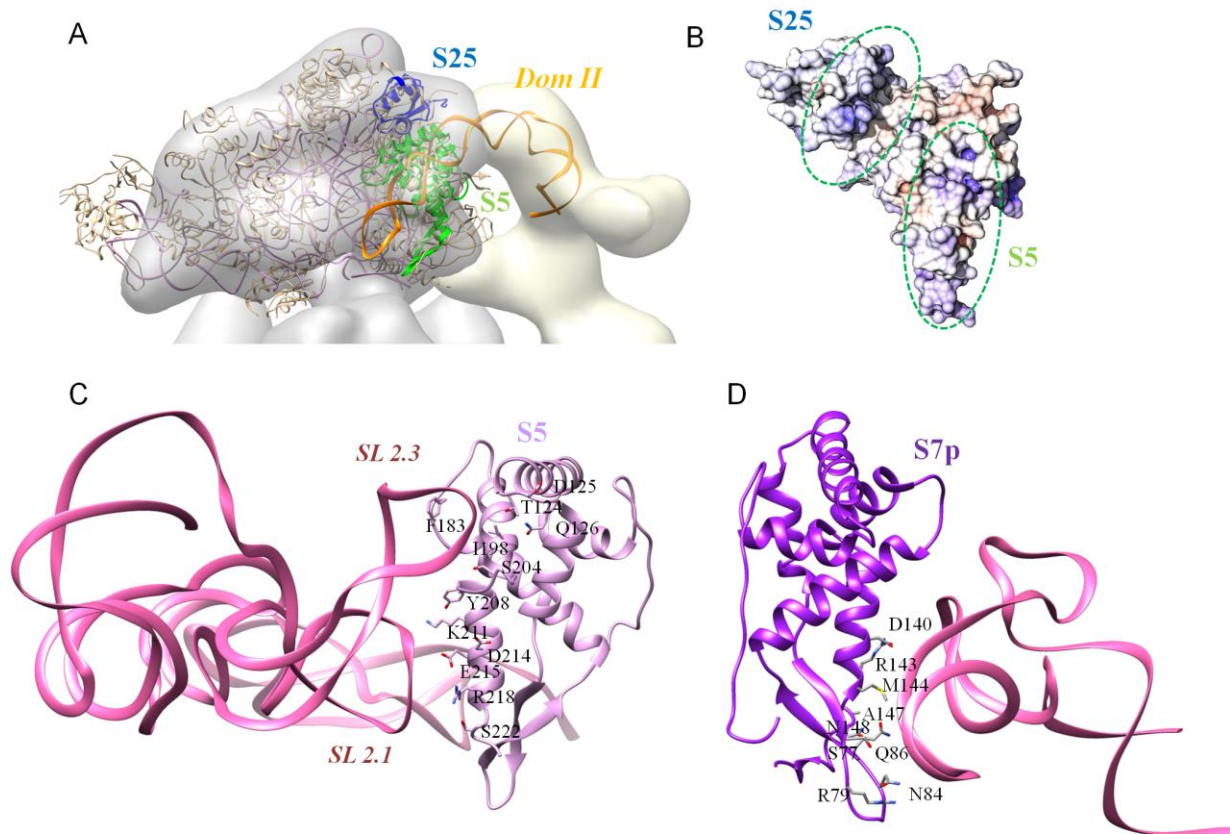

**Supplementary Figure 1.** *Interaction of HCV IRES domain II with ribosomal S5 and S25.* (A) The locations of S5 and S25 based on the fit of ribosomal head (light brown)<sup>1</sup>, are shown. The fitted structure of domain II<sup>2</sup> relative to these proteins, is given. (B) Electrostatic potential at the interface with domain II is shown. The potentials are derived using Delphi<sup>3</sup> and surface is displayed in Chimera<sup>4</sup>. (C) Residue interactions at the interface between ribosomal protein S5 (purple) and CrPV IRES RNA (pink) based on a cryoEM derived model<sup>5</sup> (PDB ID: 2NOQ). (D) Interface residues of prokaryotic ribosomal protein S7 (S5p) (purple)<sup>6</sup> that bind E-site tRNA (pink).

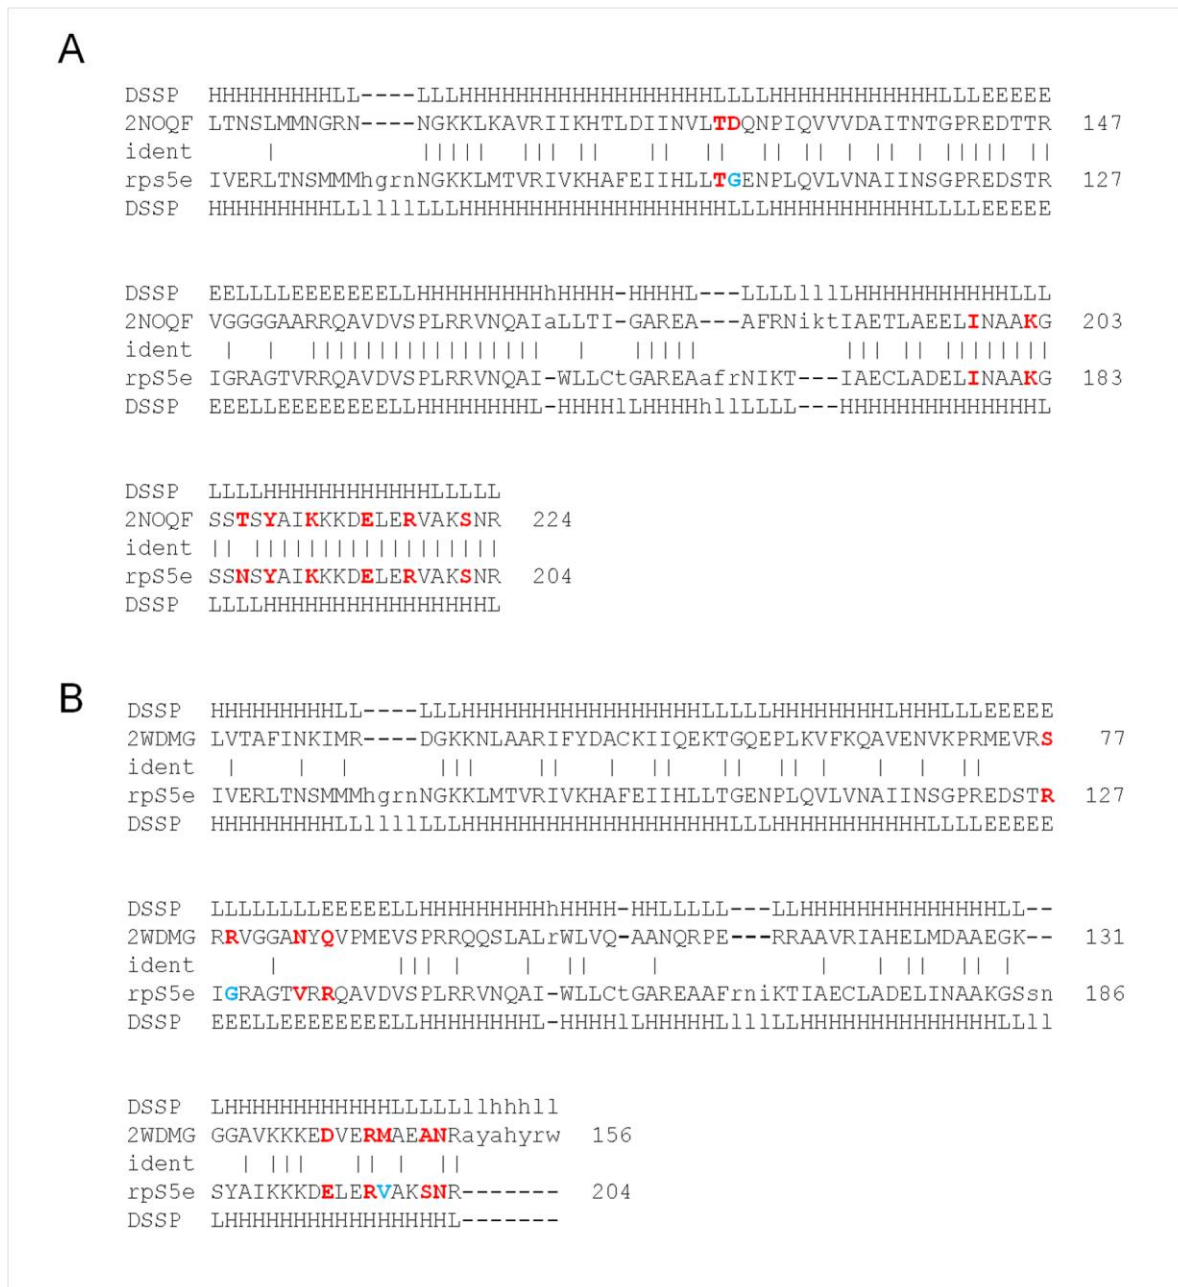

**Supplementary Figure 2.** (A) Structure based sequence alignment of human 40S S5 and yeast S5 in the CrPV bound form<sup>5</sup> (PDB ID : 2NOQ). Residues of 2NOQ, chain F (yeast S5) at the interface with CrPV IRES are highlighted in red and corresponding residues in human 40S S5 that were used as interaction restraints for docking, are also highlighted in red. Residues not added as restraints are in blue (B) Structure based sequence alignment of human 40S S5 and

prokaryotic S7 (S5p) in the crystal structure of *Thermus thermophilus* ribosome <sup>6</sup> (PDB ID : 2WDM). Residues at the interface with E-site tRNA are highlighted in red and corresponding residues of human 40S S5 are also highlighted in red and blue, depending on whether or not they are used interaction restraints. Substitutions to Gly and residues not observed at the interface of model obtained by map density fit, are not used as restraints.

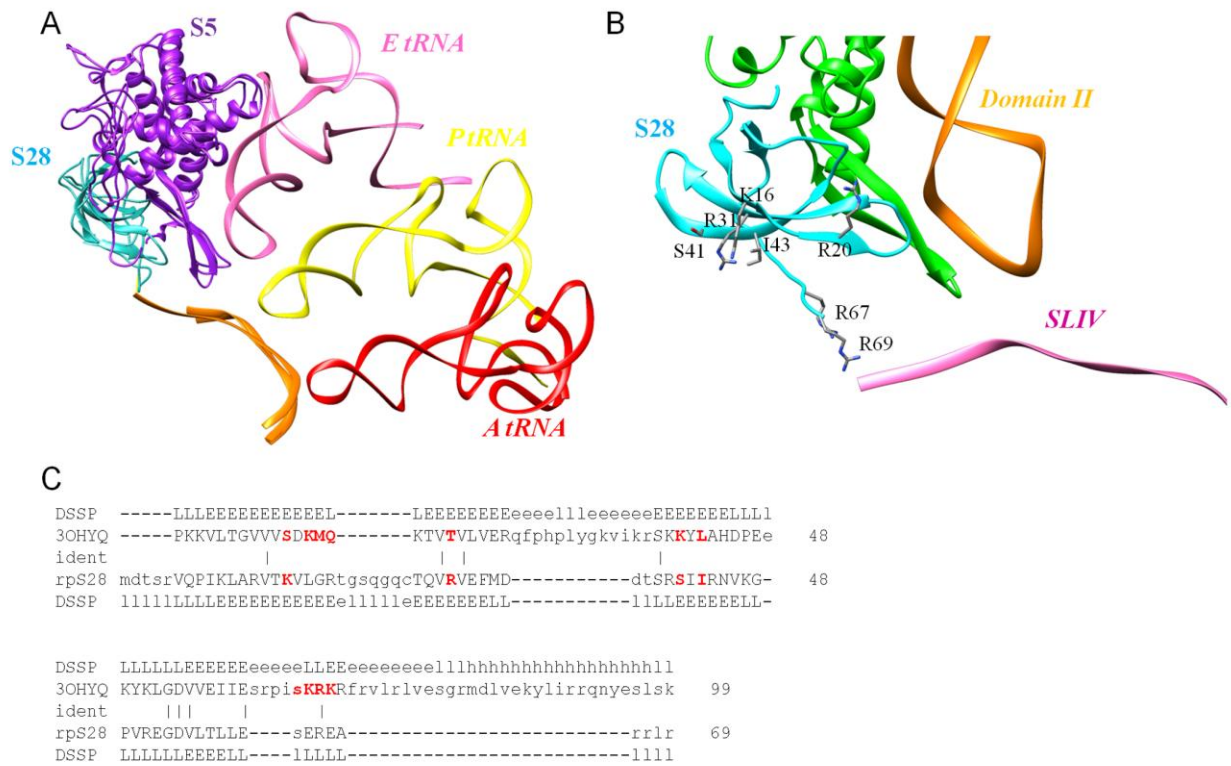

**Supplementary Figure 3.** (A) Locations of A (red), P (yellow) and E (pink) site tRNAs relative to 40S ribosomal protein S5 (purple) and S28 (cyan). The figure shows the structural alignment of coordinates from *Thermus thermophilus* ribosome <sup>6</sup> (PDB ID : 2WDM), *Triticum aestivum* ribosome <sup>7</sup> (PDB ID: 3IZ7) and rabbit 40S <sup>8</sup> (PDB ID : 4KZZ). (B) Probable interface residues of ribosomal protein S28 involved in contact with domain IV of HCV IRES. The residues were

identified by comparison with mRNA bound S28 structure <sup>8</sup> and 30S ribosomal protein S12 <sup>9</sup> – rRNA interactions (Figure 4). (C) Structure based sequence alignment of 30S ribosomal protein S12 (PDB ID : 3OHY) <sup>9</sup> and human ribosomal S28. Interface residues observed at S12 – rRNA interface are highlighted in red and equivalent residues likely to occur at the human 40S S28 – HCV IRES domain IV interface, are highlighted. Structurally equivalent residues are in uppercase.

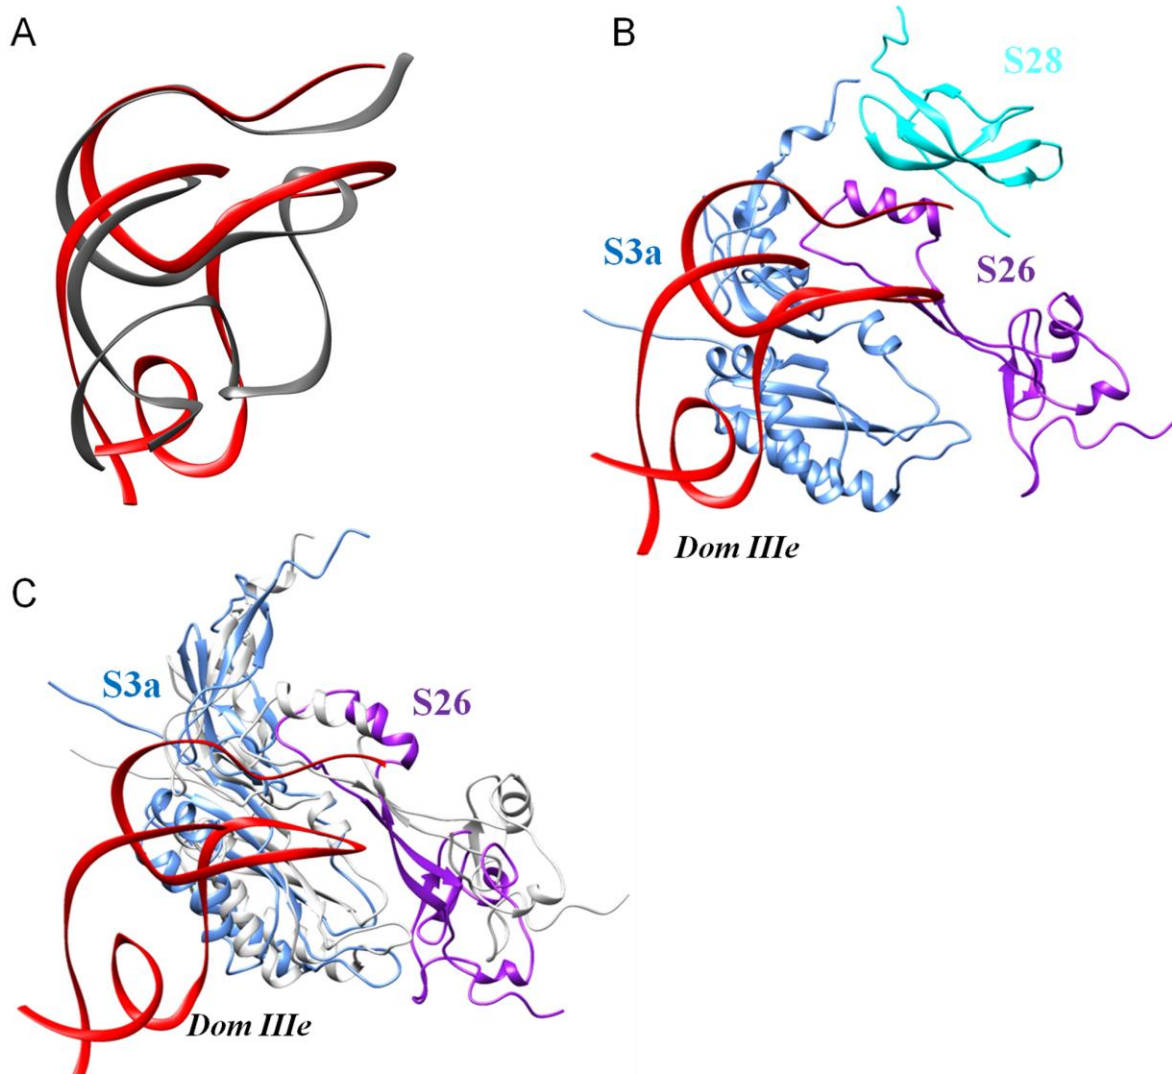

**Supplementary Figure 4.** *Model of IRES RNA involving domains IIIef and pseudoknot.* (A) Structural alignment of the crystal structure of region of IRES RNA involving the pseudoknot and domains IIIef<sup>10</sup> (dark grey) with the model generated for IIIef+pseudoknot (red). (B) The relative orientations of S26 (purple), S28 (cyan) and S3a (blue) based on fitted co-ordinates of ribosomal head and body. The fitted model of IIIef+pseudoknot (red) is also shown. (C) Comparison of docked pose with the conformation prior to docking (grey).

A

RNABindR

MAVGKNKRLTKGGKKGAKKKVVDPPFSKKDWYDVKAPAMFNIRNIGK  
TLVTRTQGTKIASDGLKGRVFEVSLADLQNDEVAFRKFKLITEDVQ  
GKNCLTNFHGMDLTRDKMCSMVKKWQTMIEAHVDVKTTDGYLLRLF  
CVGFTKKRNNQIRKTSYAQHQQVRQIRKKMMEIMTREVQTNDLKEV  
VNKLIPDSIGKDIEKACQSIYPLHDVFVRKVKMLKKPKFELGKLME  
LHGEGSSSGKATGDETGAKVERADGYEPPVQESV

BindN

MAVGKNKRLTKGGKKGAKKKVVDPPFSKKDWYDVKAPAMFNIRNIGK  
TLVTRTQGTKIASDGLKGRVFEVSLADLQNDEVAFRKFKLITEDVQ  
GKNCLTNFHGMDLTRDKMCSMVKKWQTMIEAHVDVKTTDGYLLRLF  
CVGFTKKRNNQIRKTSYAQHQQVRQIRKKMMEIMTREVQTNDLKEV  
VNKLIPDSIGKDIEKACQSIYPLHDVFVRKVKMLKKPKFELGKLME  
LHGEGSSSGKATGDETGAKVERADGYEPPVQESV

B

RNABindR

MTKKRRNNGRAKKGRGHVQPIRCTNCARCVPKDKAIKKFVIRN  
IVEAAAVRDI SEASVFDAYVLPKLYVVKLHYCVSCAIHSKVVRN  
RSREARKDRTPPPRFRPAGAAPRPPPKPM

BindN

MTKKRRNNGRAKKGRGHVQPIRCTNCARCVPKDKAIKKFVIRN  
IVEAAAVRDI SEASVFDAYVLPKLYVVKLHYCVSCAIHSKVVRN  
RSREARKDRTPPPRFRPAGAAPRPPPKPM

**Supplementary Figure 5.** *Interactions involving S26 and S3a.* Prediction of RNA binding residues for (A) S3a and (B) S26 using RNABindR <sup>11</sup> and BindN <sup>12</sup>. Positive predictions are in blue and residues occurring at interface with IIIef+pseudoknot model, are highlighted in red.

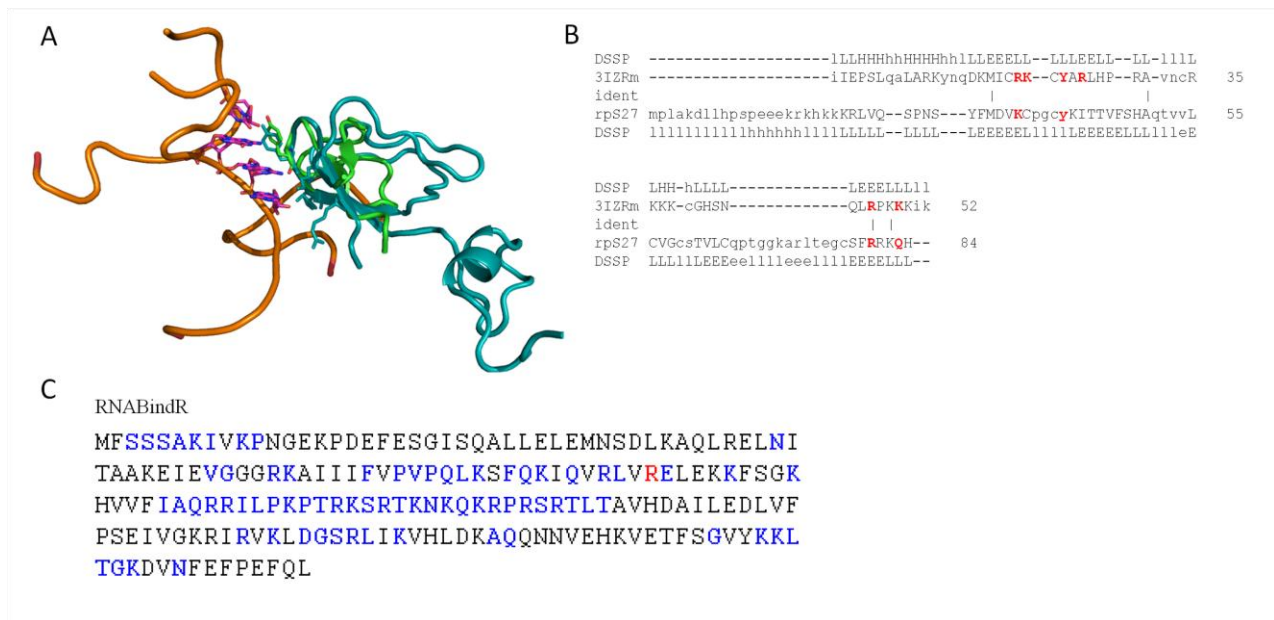

**Supplementary Figure 6. Contacts with S27.** (A) Structural alignment of human S27 (blue) and 60S ribosomal protein 140<sup>7</sup> (green). The probable RNA contact is represented in the context of 140 (B) Structure based sequence alignment of human S27 with ribosomal 140 (PDB ID: 3IZR<sup>7</sup>). RNA binding residues of the 140 observed at the interface of interest (Interface of contact of S27 and IRES), are highlighted. Structurally equivalent residues are in uppercase. (C) 40S ribosomal protein S7 residues predicted to interact with RNA by RNABindR<sup>11</sup>. Positive predictions are in blue and residue highlighted in red is in the vicinity of the RNA bulge between jIIIabc and IIIc.





rRNA base that it interacts with are highlighted in the same color. Non-preferred bases are highlighted in green.

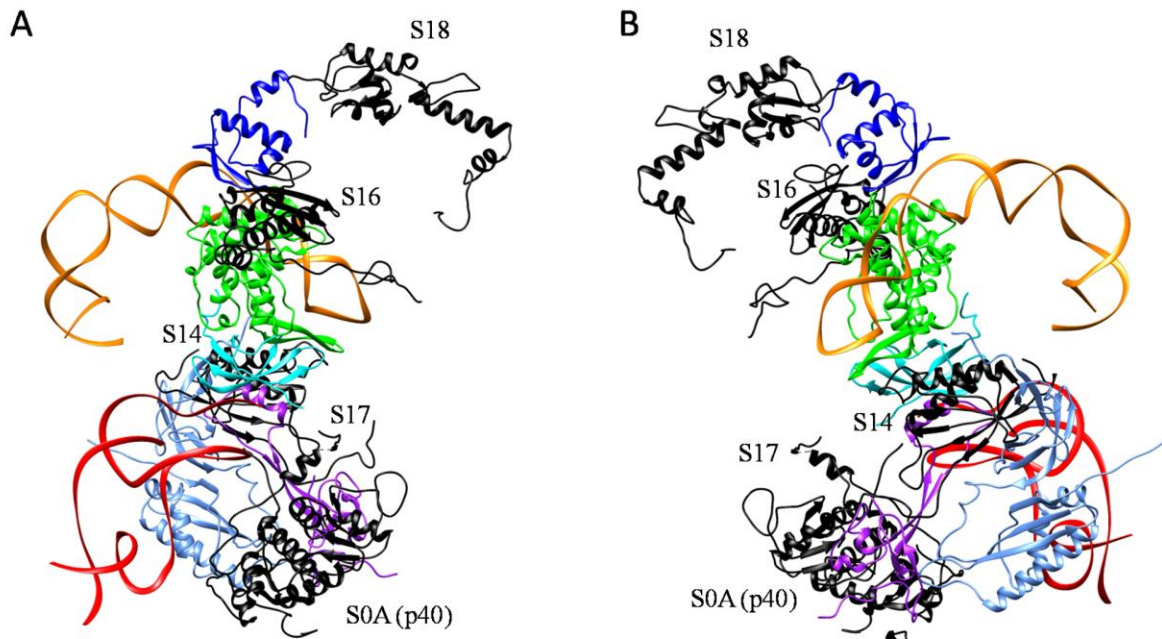

**Supplementary Figure 8.** *Proteins in the vicinity of HCV IRES.* Different 40S ribosomal proteins occurring in the vicinity of HCV IRES but not likely to participate in direct contacts, are indicated in black. (A) and (B) shows different views related by 180° rotation.

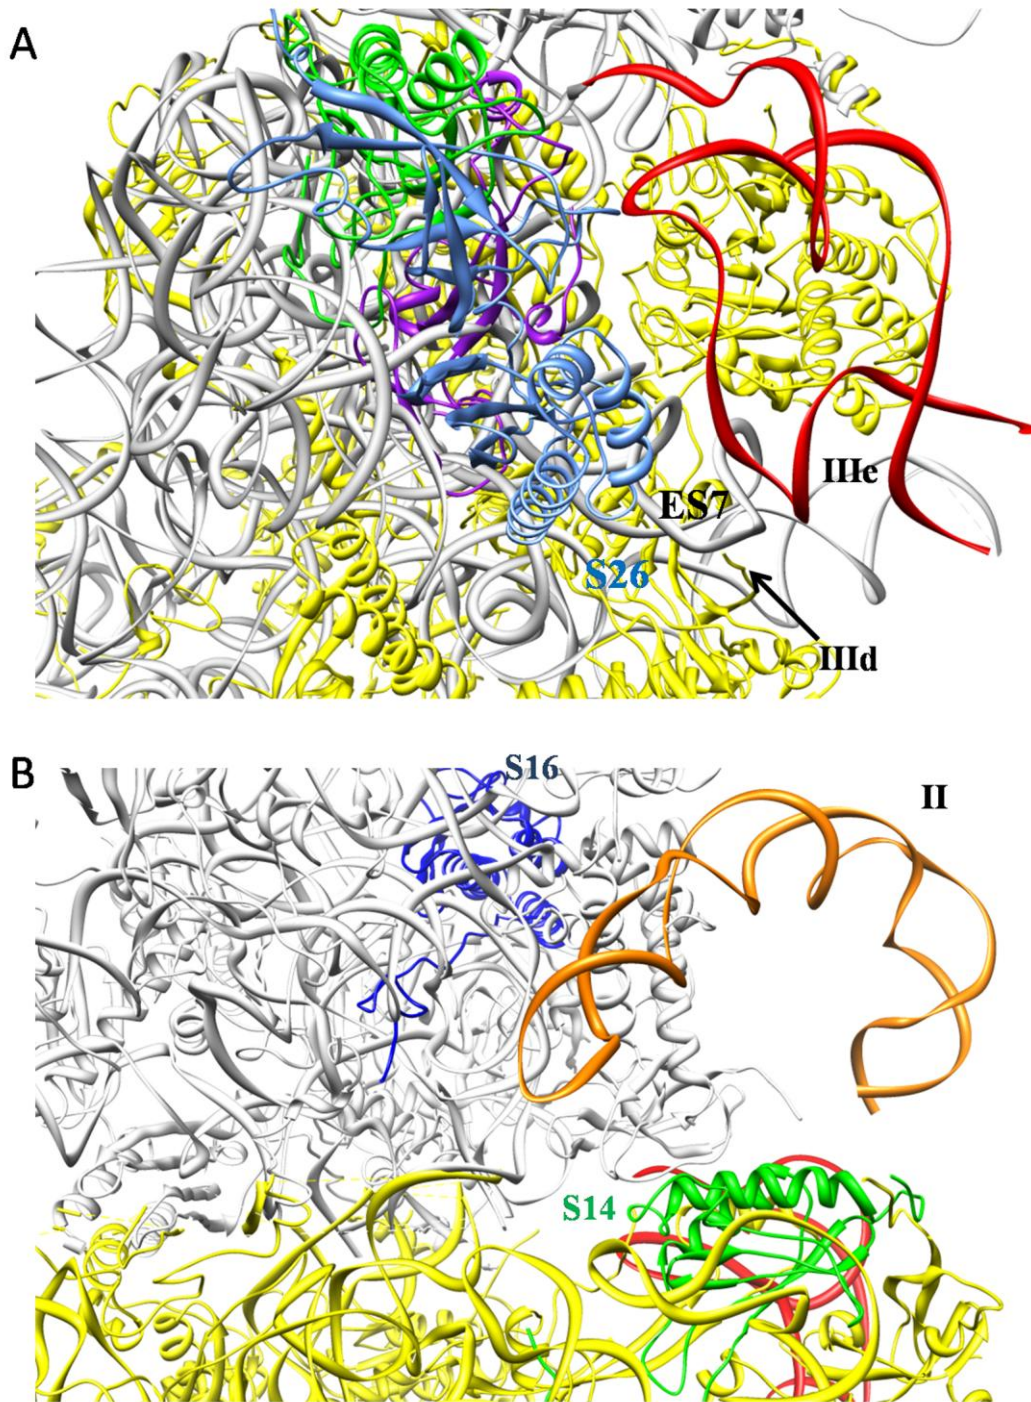

**Supplementary Figure 9.** *Proteins in the vicinity of domain II and IIIef+pseudoknot.* (A) Relative locations of proteins S3a (blue), S14 (green), expansion segment 7 (ES7), IRES domain IIIc and IIIe are shown. (B) Relative locations of HVC IRES domain II, S16 (blue) and S14



interacting bases are highlighted.

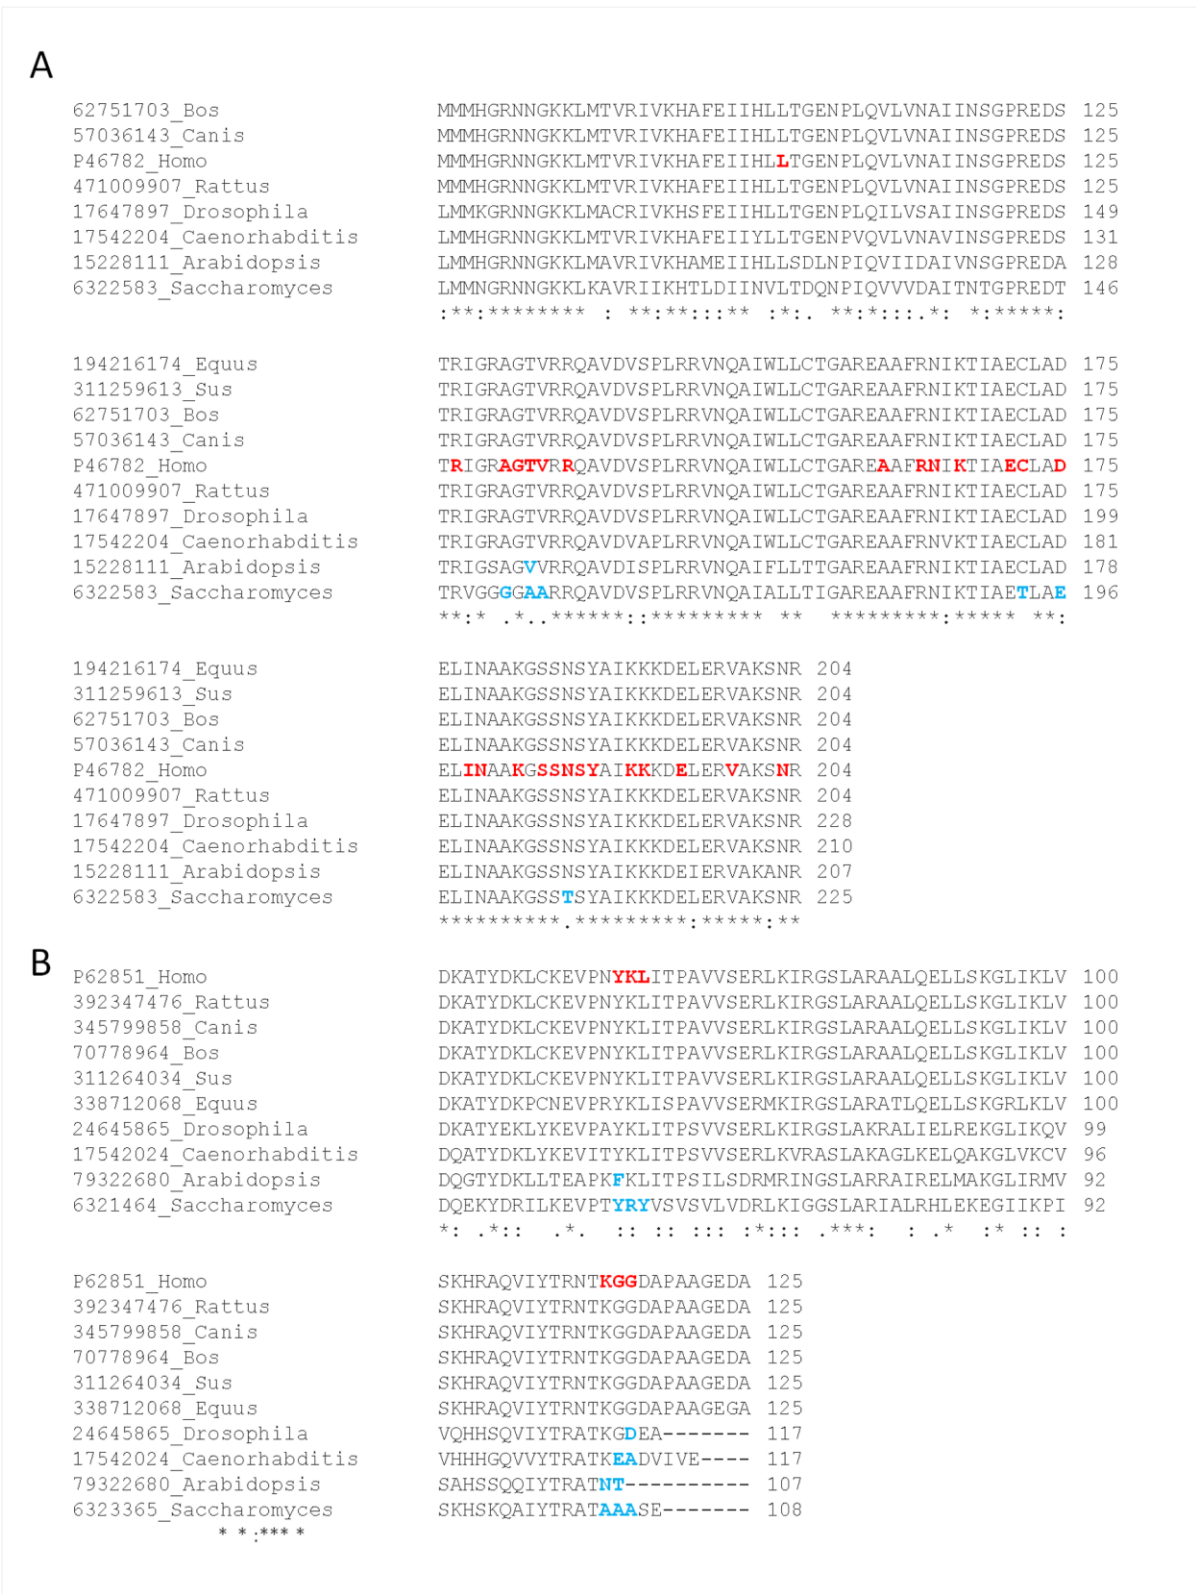

Supplementary Figure 11. Conservation of interface residues of S5 ad S25. (A) and (B)

highlights (red) interface residues of S5 and S25 that contact IRES RNA. Residues that are not conserved in another species, are shown in blue. The GI accessions are given for each sequence.

**A**

|                         |                                                       |    |
|-------------------------|-------------------------------------------------------|----|
| 15228895_Arabidopsis    | RDVQEASVYEGYTLPKLYAKTQYCVSCAIHSHVVRVRSRTNRRVRTPP--    | 98 |
| 17508699_Caenorhabditis | RDIGDASAYTQYALPKLYHKLHYCIACAIHSHKVVNRNRSREARRDRNPP--  | 98 |
| P62854_Homo             | RDISEASVFDAYVLPKLYVVKLHYCVSCAIHSHKVVNRNRSREARKDRTPP-- | 98 |
| 6981488_Rattus          | RDISEASVFDAYVLPKLYVVKLHYCVSCAIHSHKVVNRNRSREARKDRTPP-- | 98 |
| 57092393_Canis          | RDISEASVFDAYVLPKLYVVKLHYCVSCAIHSHKVVNRNRSREARKDRTPP-- | 98 |
| 62751960_Bos            | RDISEASVFDAYVLPKLYVVKLHYCVSCAIHSHKVVNRNRSREARKDRTPP-- | 98 |
| 255522917_Equus         | RDISEASVFDAYVLPKLYVVKLHYCVSCAIHSHKVVNRNRSREARKDRTPP-- | 98 |
| 147899011_Sus           | RDISEASVFDAYVLPKLYVVKLHYCVSCAIHSHKVVNRNRSREARKDRTPP-- | 98 |
| 17647893_Drosophila     | RDITEASIWDSYVLPKLYAKLHYCVSCAIHSHKVVNRNRSREARRIRTPP--  | 98 |
| 6320978_Saccharomyces   | RDLSEASVYPEYALPKTYNKLHYCVSCAIHARIVRVRNRSREDRKNRAPPQR  |    |
| 100                     |                                                       |    |

**B**

|                         |                                                      |     |
|-------------------------|------------------------------------------------------|-----|
|                         | ** : ** : *.*** * * :*:*****::** ** * : * **         |     |
| P61247_Homo_sapiens     | KLIPDSIGKDIEKACQSIYPLHDVFVRKVKMLKKPKFELGKLMELHGEGS   | 236 |
| 545210000_Equus         | KLIPDSIGKDIEKACQSIYPLHDVFVRKVKMLKKPKFELGKLMELHGEGS   | 347 |
| 296470536_Bos           | KLIPDSIGKDIEKACQSIYPLHDVFVRKVKMLKKPKFELGKLMELHGEGS   | 236 |
| 8394221_Rattus          | KLIPDSIGKDIEKACQSIYPLHDVFVRKVKMLKKPKFELGKLMELHGEGG   | 236 |
| 545557812_Canis         | KLIPDSIGKDIEKACQSIYPLHDVFVRKVKMLKKPKFELGKLMELHGEGS   | 236 |
| 212549625_Sus           | KLIPDSIGKDIEKACQPIYPLHDVFVRKVKMLKKPKFELGKLMELHGEGS   | 236 |
| 17864162_Drosophila     | KLALDSIAKDIEKSCQRIYPLHDVYIRKVKVLKKPRFDVSKLLELHGDGG   | 239 |
| 17553700_Caenorhabditis | KLIPDSIGKDIEKTCISKLYPLQEVYIRKVKIIRKPKVDLGRDLHDLHGDSI | 234 |
| 15236171_Arabidopsis    | KFIPEAIGREIEKATQGIYPLQNVFIRKVKILKAPKFDLGLMEVHGDIY    | 236 |
| 6323474_Saccharomyces   | KLIPEVINKEIENATKDI FPLQNIHVRKVKLLKQPKFDVGMALMHGEGS   | 236 |
|                         | * : * :*:*: . :*:*****::** **:... * :**:             |     |

**Supplementary Figure 12.** Conservation of interface residues of S26 ad S3a. (A) and (B) highlights (red) interface residues of S26 and S3a that contact IRES RNA. Residues that are not conserved in another species, are shown in blue. The GI accessions are given for each sequence.

```

545519486_Canis      MPLA--KDLLHPSAEEEKRKHKKQRLVQSPNSYFMDVKCPGICYKITTVFS 48
94966948_Bos        MPLA--RDLLHPSLDEEKKKKKKRLVQSPNSYFMDVKCPGICYKITTVFS 48
P42677_Homo          MPLA--KDLLHPSPEEEKRKHKKRLVQSPNSYFMDVKCPGICYKITTVFS 48
16758382_Rattus     MPLA--KDLLHPSPEEEKRKHKKRLVQSPNSYFMDVKCPGICYKITTVFS 48
545216788_Equus     MPLA--KDLLHPSPEEEKRKHKKRLVQSPNSYFMDVKCPGICYKITTVFS 48
335302490_Sus       MPLA--KDLLHSPPEEEKRKHKK-YLVQSPNSYFMDVKCPGICYKITTVFS 47
24649976_Drosophila MPLA--KDLLHPLPAEEKRKHKLRVQHPNSYFMDVKCPGICYRITTVFS 48
17563244_Caenorhabditis MPLA--VDLLHPEPQREIRCHKLKRLVQHPNSYFMDVKCSGCFKISTVFS 48
15238845_Arabidopsis MVLQNDIDLLHPPPELEK RKHKLRVQSPNSFFMDVKCQGCFNITTVFS 50
6321809_Saccharomyces MVLV--QDLLHPTAASEARKHKLRVQSPNSYFLDVKCPGCLNITTVFS 48
* *      ****.      * : **      *** *.*:**** * * .*:****

545519486_Canis      HAQTVVLCVGCSTVLCQPTGGKARLTEGCSFRQKQH 84
94966948_Bos        HAQTVVLCVGCSTVLCQPTGGKARLTEGCSFRKQH 84
P42677_Homo          HAQTVVLCVGCSTVLCQPTGGKARLTEGCSFRKQH 84
16758382_Rattus     HAQTVVLCVGCSTVLCQPTGGKARLTEGCSFRKQH 84
545216788_Equus     HAQTVVLCVGCSTVLCQPTGGKARLTEGCSFRKQH 84
335302490_Sus       HAQTVVLYVGCSAVLCQPTGGKARLTEGCSFRKQR 83
24649976_Drosophila HAQGVVVCAGCATILCQPTGGRAKLTEGCSFRKPKQ 84
17563244_Caenorhabditis HATTVVVCVGCNTVLCQPTRGKAKLTEGCSFRKKQ- 83
15238845_Arabidopsis HSQTVVVCVGCNTVLCQPTGGKARLQEGCSFRKK-- 84
6321809_Saccharomyces HAQTAVTCECSTVLCPTGGKAKLSEGTSFRK-- 82
*:      .*      .* ::* ** *:*:* ** **.*

```

**Supplementary Figure 13.** Conservation of interface residues of S27. Interface residues of S27 (red) that contact IRES RNA are highlighted. Residues that are not conserved in another species, are shown in blue. The GI accessions are given for each sequence.





extent of conservation is indicated below the alignment. The GI accessions are given for each sequence

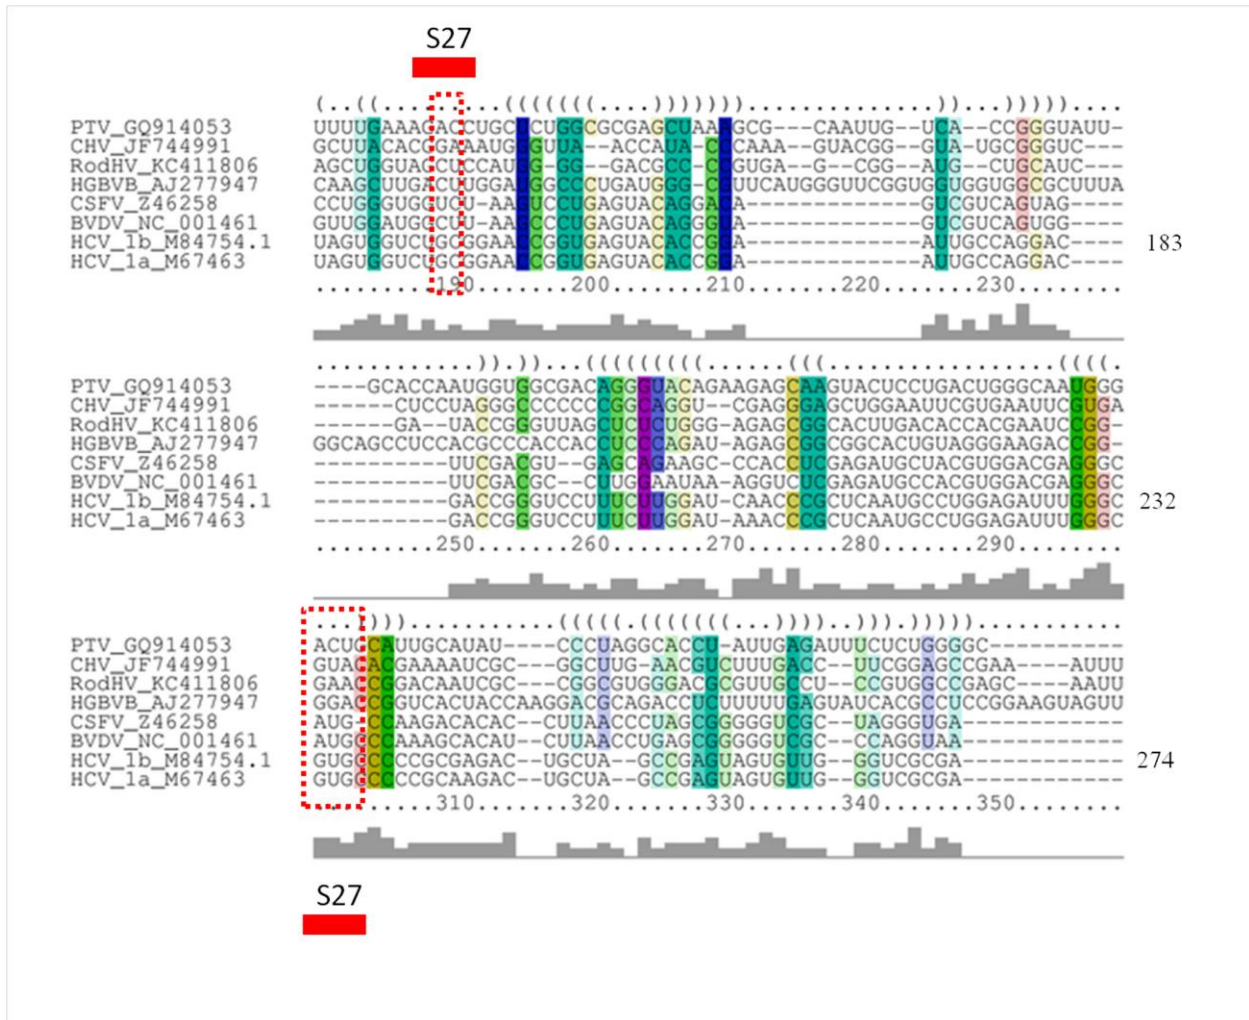

**Supplementary Figure 15.** Conservation of IRES RNA bases. Bases that occur at the interface with ribosomal proteins S27 are highlighted. The figure shows multiple alignment of IRES RNA sequences from Porcine teschovirus (PTV), Canine herpesvirus (CHV), Rodent herpesvirus (RodHV), Hepatitis GBVB (HGBVB), Classical swine fever virus (CSFV), Bovine viral diarrhea virus (BVDV) and HCV IRES subtypes. Alignment was carried out using LocaRNA<sup>14</sup> and the coloring reflects compatibility for base-pairing. A consensus secondary structure is also provided on top and extent of conservation is indicated below the alignment. The GI accessions are given

for each sequence

**Supplementary Table 1.** *Structural relatives with nucleic acid binding properties.* For the ribosomal proteins S28, S7 and S27, the *rmsd* and *Z*-scores of the folds identified as structural relatives, are listed. DALI<sup>15</sup> was used for doing the structure comparison and search.

| <b>Ribosomal Protein</b> | <b>Related Fold (PDB code)</b> | <b><i>rmsd</i></b> | <b><i>Z score</i></b> |
|--------------------------|--------------------------------|--------------------|-----------------------|
| S28                      | 3OHY                           | 3.4 Å              | 3.5                   |
| S27                      | 3IZR                           | 2.0 Å              | 2.6                   |

**Supplementary Table 2.** *Dope Score<sup>16</sup> of models selected for human ribosomal 40S proteins.*

| <b>Ribosomal Protein</b> | <b>Dope Score</b> |
|--------------------------|-------------------|
| S5                       | -17590.8          |
| S25                      | -7006.4           |
| S26                      | -5486.6           |
| S28                      | -4346.3           |
| S3a                      | -18404.8          |
| S27                      | -5264.0           |
| S7                       | -17603.2          |

## Supplementary data 1: Structure based sequence alignments

1. Structure based sequence alignment of human 40S S5 and yeast S5 in the CrPV bound form 5 (PDB ID : 2NOQ). Residues of 2NOQ, chain F (yeast S5) at the interface with CrPV IRES are highlighted in red and corresponding residues in human 40S S5 that were used as interaction restraints for docking, are also highlighted in red. Residues not added as restraints are in blue.

```
>2NOQF
-----rYANKRFRKAqcpiieR
LTNSLMMNGRN----NGKKLKAVRI IKHTLDI INVLTTDQNPIQVVVDAITNTGPREDTTR
VGGGGAARRQAVDVSPLRRVNQAIaLLTI-GAREA---AFRNiktIAETLAEELINAAKG
SSTSYAIKKKDELERVAKSNR
```

```
>rps5e
tpdiklfgkwstddvqindislqdyiavkekyakylphsagryaAKRFRKAQC-----P
IVERLTNSMMHgrnNGKKLMTVRIVKHAFEI IHLLTGENPLQVLVNAI INSGPREDSTR
IGRAGTVRRQAVDVSPLRRVNQAI-WLLCtGAREAAfrNIKT---IAECLADELINAAKG
SSNSYAIKKKDELERVAKSNR
```

2. Structure based sequence alignment of human 40S S5 and prokaryotic S7 (S5p) in the crystal structure of *Thermus thermophilus* ribosome (PDB ID : 2WDM). Residues at the interface with E-site tRNA are highlighted in red and corresponding residues of human 40S S5 are also highlighted in red and blue, depending on whether or not they are used interaction restraints. Substitutions to Gly and residues not observed at the interface of model obtained by map density fit, are not used as restraints.

```
>2WDMG
-----arrrrAEVRQLQPdlvygdV
LVTAFINKIMR----DGKKNLAARIFYDACKIIQEKTGQEPKLVFKQAVENVKPRMEVRS
RVVGGANYQVPMEVSPRRQQLALrWLWQ-AANQRPE---RRAAVRIAHELMDAAEGK--
GGAVKKKEDVERMAEANRayahyrw
```

```
>rpS5e
tpdiklfgkwstddvqindislqdyiavkekyakylphsagryaaKRFRKAQC-----P
IVERLTNSMMHgrnNGKKLMTVRIVKHAFEI IHLLTGENPLQVLVNAI INSGPREDSTR
IGRAGTVRRQAVDVSPLRRVNQAI-WLLCtGAREAAFrniKTIAECLADELINAAKGSsn
SYAIKKKDELERVAKSNR-----
```

3. Structure based sequence alignment of 30S ribosomal protein S12 (PDB ID : 3OHY) and human ribosomal S28. Interface residues observed at S12 – rRNA interface are highlighted in red and equivalent residues likely to occur at the human 40S S28 – HCV IRES domain IV interface, are highlighted. Structurally equivalent residues are in uppercase.

```
>3OHYQ
-----PKKVLTGVVVSDKMQ-----KTVLVERqfphplygkvikrSKKYLAHDPEe
KYKLGDVVEIIEsrpiSKRKRfrvrlrlvesgrmdlvekylirrqnyeslsk
```

```
>rpS28
```

```
mdtsrVQPIKLARVTKVLGRtgsqqqcTQVRVEFMD-----dtSRSIIRNVKG-
PVREGDVLTLLE----sEREA-----rrlr
```

4. Structure based sequence alignment of human S27 with ribosomal l40 (PDB ID: 3IZR). RNA binding residues of the l40 observed at the interface of interest (Interface of contact of S27 and IRES), are highlighted. Structurally equivalent residues are in uppercase.

```
>3IZRm
-----iIEPSLqaLARKynqDKMICRK--CYARLHP--RA-vncR
KKK-cGHSN-----QLRPPKKik
>rpS27
mplakd11hpspeeeekrkhkkKRLVQ--SPNS---YFMDVKCpgcyKITTVFSHAqtvvL    55
CVGcsTVLCqptggkarltegcSFRKQH--
```

5. Structure based sequence alignment obtained by the comparison of structures of S25 and FadR transcription factor. Structurally equivalent residues are in uppercase.

```
>1H9Ta
-----aQSPAGFAEEYIIESiwnnrFPPGTILPaERELSELIGVTRTTLREVLQ
RLAR--DGWLTIQHGKPTKVNnfwetsglniletlarldhesvpqlidvllsvrtnisti
>rpS27
skgkvrdklnnlVLFDKATYDKLCKE-----VPNYKLIT-PAVVSERLKIRGSLARAALQ
ELLSKgLIKLVSKHRAQVIYT-----
```

6. Multiple alignment of S25 sequences highlighting conserved residues involved base specific contacts with 18S rRNA interaction.

```
>Q5BES5_EMENI/472-573
EKATAERLNKDVQSY-RLITVATLVDRKINGSLARKALADLEEKGQIKKVVGHHSK-MNIYTRAV
>Q2UQX8_ASPOR/43-128
EKTVAERLNKDVQSY-RLITVATLVDRKINGSLARKALEDLEEKGQIKKVVGHHSK-LNIYTRAV
>RS25A_YEAST/1-105
DQEKYDRILKEVPTY-RYVSVSVLVDRKIGGSLARIALRHLEKEGIIKPISKHHSK-QAIYTRAT
>Q59NZ2_CANAL/1-105
DQEKYDRILKDVPTY-KYVSVSVLVDRKIGGSLARVALRQLEEDGIITPVLKHHSK-QAIYTRAQ
>RS254_ARATH/1-106
DQATYDKLLTEAPKF-KLITPSILSDRMRINGSLARRAIRELMAKGVIRMVAAHSS-QQIYTRAT
>Q53LU9_ORYSJ/936-1032
DKATYDKLLSEVPKY-KQITPSVLSELRINGSLARQAIKDLESRGAIRVSVHSS-QLIYTRAT
>RS25_DROME/1-112
DKATYKLYKEVPAY-KLITPSVVSERLKIRGSLAKRALIELREKGLIKQVVQHHS-QVIYTRAT
>Q201X9_ACYPI/1-112
DKVSYDKLYKEVPSY-KLITPSVVSERLKVRSGLARRALDELQKGLIKQVIQHRA-QLIYTRVT
>RS25_CAEEL/1-109
DQATYDKLYKEVITY-KLITPSVVSERLKVRSGLAKAGLKELQAKGLVKCVVHHG-QVVYTRAT
>RS25_HUMAN/1-113
DKATYDKLCKEVPNY-KLITPAVVSERLKIRGSLARAALQELLSKGLIKLVSKHRA-QVIYTRNT
```

```

>Q58EA6_MOUSE/1-113
DKATYDKLCKEVPNY-KLITPAVVSERLKIRGSLARAALQELLKGLIKLVSKHRA-QVIYTRNT
>Q6DJJ1_XENLA/1-113
DKATYDKLCKEVPNY-KLITPAVVSERLKIRGSLARAALQELLNKGLIKLVSKHRA-QVIYTRNT
>Q4Q3G4_LEIMA/1-105
DKETYDKLRSEVPKY-KLITPSIISDRLKIAVSIAAAGLKQLCREKLIRLVSCSSK-TRVYTRIV
>Q5CTY4_CRYPI/1-106
DKKTADRFRHSDVLKS-RLITPAVVVNQLKVNASAAARAMLRDCESKGIIKPVGEQTHGQMIYTKA-
>A0BF01_PARTE/25-135
DNtsyKQIETQLPKMGALITVSTVSDKFKVNGSLARRCIRHFAKSGLLVPAGDQNSKQYIFTVNA

```

7. The alignment highlights (red) interface residues of S5 that contact IRES RNA. Residues that are not conserved in another species, are shown in blue. The GI accessions are given for each sequence.

```

>194216174_Equus
-----MTEWETAAPAVAETPDIKLFQKST
DVQINDISLQDYIAVK-EKYAKYLPHSAGRYAAKRFRKAQCPIVERLTNS
MMHGRNNGKKLMTVRIVKHAFEI IHLLTGENPLQVLVNAI INSGPREDS
TRIGRAGTVRRQAVDV SPLRRVNQAIWLLCTGAREAAFRNIKTIAECLAD
ELINAAGSSNSYAIKKKDELERVAKSNR
>311259613_Sus
-----MTEWETAAPAVAETPDIKLFQKST
DVQINDISLQDYIAVK-EKYAKYLPHSAGRYAAKRFRKAQCPIVERLTNS
MMHGRNNGKKLMTVRIVKHAFEI IHLLTGENPLQVLVNAI INSGPREDS
TRIGRAGTVRRQAVDV SPLRRVNQAIWLLCTGAREAAFRNIKTIAECLAD
ELINAAGSSNSYAIKKKDELERVAKSNR
>62751703_Bos
-----MTEWETAAPAVAETPDIKLFQKST
DVQINDISLQDYIAVK-EKYAKYLPHSAGRYAAKRFRKAQCPIVERLTNS
MMHGRNNGKKLMTVRIVKHAFEI IHLLTGENPLQVLVNAI INSGPREDS
TRIGRAGTVRRQAVDV SPLRRVNQAIWLLCTGAREAAFRNIKTIAECLAD
ELINAAGSSNSYAIKKKDELERVAKSNR
>57036143_Canis
-----MTEWETAAPAVAETPDIKLFQKST
DVQINDISLQDYIAVK-EKYAKYLPHSAGRYAAKRFRKAQCPIVERLTNS
MMHGRNNGKKLMTVRIVKHAFEI IHLLTGENPLQVLVNAI INSGPREDS
TRIGRAGTVRRQAVDV SPLRRVNQAIWLLCTGAREAAFRNIKTIAECLAD
ELINAAGSSNSYAIKKKDELERVAKSNR
>P46782_Homo
-----MTEWETAAPAVAETPDIKLFQKST
DVQINDISLQDYIAVK-EKYAKYLPHSAGRYAAKRFRKAQCPIVERLTNS
MMHGRNNGKKLMTVRIVKHAFEI IHLTGENPLQVLVNAI INSGPREDS
TRIGRAGTVRRQAVDV SPLRRVNQAIWLLCTGAREAAFRNIKTIAECLAD
ELINAAGSSNSYAIKKKDELERVAKSNR
>471009907_Rattus
-----MTEWETAAPAVAETPDIKLFQKST
DVQINDISLQDYIAVK-EKYAKYLPHSAGRYAAKRFRKAQCPIVERLTNS
MMHGRNNGKKLMTVRIVKHAFEI IHLLTGENPLQVLVNAI INSGPREDS
TRIGRAGTVRRQAVDV SPLRRVNQAIWLLCTGAREAAFRNIKTIAECLAD
ELINAAGSSNSYAIKKKDELERVAKSNR
>17647897_Drosophila
MAEVAENVVETFEPAAPMEAEVAETILETNVSTTELPEIKLFGRWSCD
DVTVNDISLQDYISVK-EKFARYLPHSAGRYAAKRFRKAQCPIVERLTCS
LMMKGRNNGKKLMACRIVKHSFEI IHLLTGENPLQILVSAI INSGPREDS

```

```

TRIGRAGTVRRQAVDVSPLRRVNQAIWLLCTGAREAAFRNIKTIAECLAD
ELINAAGSSNSYAIAKKKDELERVAKSNR
>17542204_Caenorhabditis
-----MADNWGSENVVADAAPATEAPEVALFGKWSLQ
SVNVSDISLVDYIPVK-EKSAKYLPHSAGRFQVRRFRKAACPIVERLANS
LMMHGRNNGKMLMTVRIVKHAFEIYLLTGENPVQVLVNAVINSGPREDS
TRIGRAGTVRRQAVDVAPLRRVNQAIWLLCTGAREAAFRNVKTIAECLAD
ELINAAGSSNSYAIAKKKDELERVAKSNR
>15228111_Arabidopsis
-----MAASAEIDAEIQQQLTNEVKLFNRWSFD
DVSVTDISLVDYIGVQPSKHATFVPHTAGRYSVKRFRKAQCPIVERLTNS
LMMHGRNNGKMLMAVRIVKHAMEIHLSDLNPIQVIIDAIVNSGPRED
TRIGSAGVVRQAVDISPLRRVNQAIWLLTGTGAREAAFRNIKTIAECLAD
ELINAAGSSNSYAIAKKKDEIERVAKANR
>6322583_Saccharomyces      MSDTEAPVEVQEDFEVVEEFTPVVLATPIPEEVQQAQT-
EIKLFNKWSFE
EVEVKDASLVDYVQVR---QPIFVAHTAGRYANKRFRKAQCPIIERLTNS
LMMNGRNNGKMLKAVRIKHTLDIINVLTQNPQVVDATNTGPREDT
TRVGGGAARRQAVDVSPLRRVNQAIALLTIGAREAAFRNIKTIAETLAE
ELINAAGSSTSYAIAKKKDELERVAKSNR

```

8. The alignment highlights (red) interface residues of S26 that contact IRES RNA. Residues that are not conserved in another species, are shown in blue. The GI accessions are given for each sequence.

```

>15228895_Arabidopsis
MTFKRRNNGRNKHNRGHVKPIRCSNCGKCCPKDKAIAKRFIVRNIVEQAAI
RDVQEASVYEGYTLPKLYAKTQYCVSCAIHSHVVRVRSRTNRRVTRTPP-
PRFARRKEDTPKPAQPGQAPRPAGGAPAAPRA
>17508699_Caenorhabditis
MTFKRRNHGRNKKNRGHVAFIRCTNCGRCCPKDKAIAKRFVVRNIVEAAAV
RDIGDASAYTQYALPKLYHKLHYCIACAIHSKVVRNRSREARRDRNPP--
PRFGQR-AAAAARPGAPG--PRP-----
>P62854_Homo
MTKKRRNNGRAKKGRGHVQPIRCTNCARCVPKDKAIAKRFVIRNIVEAAAV
RDISEASVFDAYVLPKLYVVKLHYCVSCAIHSKVVRNRSREARKDRTPP--
PRFRPAGAAPRPPPKPM-----
>6981488_Rattus
MTKKRRNNGRAKKGRGHVQPIRCTNCARCVPKDKAIAKRFVIRNIVEAAAV
RDISEASVFDAYVLPKLYVVKLHYCVSCAIHSKVVRNRSREARKDRTPP--
PRFRPAGAAPRPPPKPM-----
>57092393_Canis
MTKKRRNNGRAKKGRGHVQPIRCTNCARCVPKDKAIAKRFVIRNIVEAAAV
RDISEASVFDAYVLPKLYVVKLHYCVSCAIHSKVVRNRSREARKDRTPP--
PRFRPAGAAPRPPPKPM-----
>62751960_Bos
MTKKRRNNGRAKKGRGHVQPIRCTNCARCVPKDKAIAKRFVIRNIVEAAAV
RDISEASVFDAYVLPKLYVVKLHYCVSCAIHSKVVRNRSREARKDRTPP--
PRFRPAGAAPRPPPKPM-----
>255522917_Equus
MTKKRRNNGRAKKGRGHVQPIRCTNCARCVPKDKAIAKRFVIRNIVEAAAV
RDISEASVFDAYVLPKLYVVKLHYCVSCAIHSKVVRNRSREARKDRTPP--
PRFRPAGAAPRPPPKPM-----
>147899011_Sus
MTKKRRNNGRAKKGRGHVQPIRCTNCARCVPKDKAIAKRFVIRNIVEAAAV

```

RDISEASVFDAYVLPKLYVKLHYCVSCAIHSKVVNRNRSREARKDRTTP--  
PRFRPAGAAPRPPPKPM-----  
>17647893\_Drosophila  
MTKKRRNGGRNKHNRGHVVKPVRCTNCARCVPKDKAIKKFVIRNIVEAAAV  
RDITEASIWDSYVLPKLYAKLHYCVSCAIHSKVVNRNRSREARRIRTPP-  
LRSFPKDMARNNQNRK-----  
>6320978\_Saccharomyces  
MPKKRASNGRNKKGRGHVVKPVRVCVNCSSKIPKDKAIKRMAIRNIVEAAAV  
RDLSEASVYPEYALPKTYNKLHYCVSCAIHARIVRVRNRSREDRKNRAPPQR  
PRFNRDNKVSPAAAAKKAL-----



9. The alignment highlights (red) interface residues of S25 that contact IRES RNA. Residues that are not conserved in another species, are shown in blue. The GI accessions are given for each sequence.

```
>P62851_Homo
MPPKDDKKKKDAGKSAKKDKDPVNKSGGKAKKKKWSKGVKVRDKLNNLVLF
DKATYDKLCKEVPNYKLIITPAVVSERLKIRGSLARAALQELLSKGLIKLV
SKHRAQVIYTRNTKGGDAPAAGEDA
>392347476_Rattus
MLPKDDKKKKDAGKSAKKDKDPVNKSGGKAKKKKWSKGVKVRDKLNNLILF
DKATYDKLCKEVPNYKLIITPAVVSERLKIRGSLARAALQELLSKGLIKLV
SKHRAQVIYTRNTKGGDAPAAGEDA
>345799858_Canis
MPPKDDKKKKDAGKSAKKDKDPVNKSGGKAKKKKWSKGVKVRDKLNNLVLF
DKATYDKLCKEVPNYKLIITPAVVSERLKIRGSLARAALQELLSKGLIKLV
SKHRAQVIYTRNTKGGDAPAAGEDA
>70778964_Bos
MPPKDDKKKKDAGKSAKKDKDPVNKSGGKAKKKKWSKGVKVRDKLNNLVLF
DKATYDKLCKEVPNYKLIITPAVVSERLKIRGSLARAALQELLSKGLIKLV
SKHRAQVIYTRNTKGGDAPAAGEDA
>311264034_Sus
MPPKDDKKKKDAGKSAKKDKDPVNKSGGKAKKKKWSKGVKVRDKLNNLVLF
DKATYDKLCKEVPNYKLIITPAVVSERLKIRGSLARAALQELLSKGLIKLV
SKHRAQVIYTRNTKGGDAPAAGEDA
>338712068_Equus
MPPKDNKKKKDAGKSAKKDKDPVNKSGGKATKKKWSKGVQDKLNNLVLF
DKATYDKPCNEVPYKLIITPAVVSERMKIRGSLARATLQELLSKGRLKLV
SKHRAQVIYTRNTKGGDAPAAGEGA
>24645865_Drosophila
MPPKDAKS-SAKQPQKTQKKKEGSGGKAKKKKWSKGVKVRDKLNNQVLF
DKATYEKLYKEVPAYKLIITPSVVSERLKIRGSLAKRALIELREKGLIKQV
VQHHSQVIYTRATKGD EA-----
>17542024_Caenorhabditis
MPPKDKPKG-GKAPP---SKKKEGSGGKAKKKKWSKGVKVRDKLNNMVLV
DQATYDKLYKEVITYKLIITPSVVSERLKVRASLAKAGLQAKGLVKCV
VHHHGQVYTRATKEADVIVE----
>79322680_Arabidopsis
MAPKDKVPPSSKPAK-----SGGGKQ-KKKWSKGVKQEKVNNMVLV
DQGTYDKLLTEAPKFKLITPSILSDRMIRINGSLARRAIRELMAKGLIRMV
SAHSSQIYTRATNT-----
>6321464_Saccharomyces
MPPKQQLSKAAKAAAA-----LAGGKKSKKKWSKKSMDRAQHAVIL
DQEKYDRILKEVPTYRYVSVSVLVDRLKIGGSLARIALRHLEKEGIKPI
SKHRSQAIYTRATAAA SE-----
```

10. The alignment highlights (red) interface residues of S27 that contact IRES RNA. Residues that are not conserved in another species, are shown in blue. The GI accessions are given for each sequence.

```
>545519486_Canis
MPLA--KDLLHPSAEEEEKRKHKKQRLVQSPNSYFMDVKCPGICYKITTVFS
HAQTVVLCVGCSTVLCQPTGGKARLTEGCSFRRKQH
>94966948_Bos
MPLA--RDLLHPSLDEEKKKHKKRLVQSPNSYFMDVKCPGICYKITTVFS
HAQTVVLCVGCSTVLCQPTGGKARLTEGCSFRRKQH
>P42677_Homo
MPLA--KDLLHPSPEEEKRKHKKRLVQSPNSYFMDVKCPGICYKITTVFS
HAQTVVLCVGCSTVLCQPTGGKARLTEGCSFRRKQH
>16758382_Rattus
MPLA--KDLLHPSPEEEKRKHKKRLVQSPNSYFMDVKCPGICYKITTVFS
HAQTVVLCVGCSTVLCQPTGGKARLTEGCSFRRKQH
>545216788_Equus
MPLA--KDLLHPSPEEEKRKHKKRLVQSPNSYFMDVKCPGICYKITTVFS
HAQTVVLCVGCSTVLCQPTGGKARLTEGCSFRRKQH
>335302490_Sus
MPLA--KDLLHSSPEEEKRKHKK-YLVQSPNSYFMDVKCPGICYKITTVFS
HAQTVVLYVGC SAVLCQPTGGKARLTEGCSFRRKQR
>24649976_Drosophila
MPLA--KDLLHPLPAEEKRKHKLRLVQHPNSYFMDVKCPGICYRITTVFS
HAQGVVVCAGCATILCQPTGGRAKLTEGCSFRRKPQ
>17563244_Caenorhabditis
MPLA--VDLLHPEPQREIRCHKLRLVQHPNSYFMDVKCSGCFKISTVFS
HATTVVVVCVGCNTVLCQPTRGKAKLTEGCSFRKKQ-
>15238845_Arabidopsis
MVLQNDIDLHPPPELEKRKHKLRLVQSPNSFFMDVKCQGC FNITTVFS
HSQTVVVCVGCNTVLCQPTGGKARLQEGCSFRKK--
>6321809_Saccharomyces
MVLV--QDLLHPTAASEARKHKLTLVQGPRSYFLDVKCPGCLNITTVFS
HAQTAVTCECSTVLCPTGGKAKLSEGTSFRRK--
```

11. The alignment highlights (red) interface residues of S3a that contact IRES RNA. Residues that are not conserved in another species, are shown in blue. The GI accessions are given for each sequence.

```
>P61247_Homo_sapiens
-----MAVGKNKRLTKGGKKGAKKKVVDPFSSKKDWYDVKAPAMF
NIRNIGKTLVTRTQGTKIASDGLKGRVFEVSLADLQND---EVAFRKFKL
ITEDVQGKNCNTNFHGMDLTRDKMCSMVKKWQTMIEAHVDVKTDDGYLLR
LFCVGFTEKKRNNQIRKTSYAQHQQVRQIRKKMMEIMTREVQTNDLKEVVN
KLIPDSIGKDIEKACQSIYPLHDVFVRKVKMLKKPKFELGKLMELHGEFS
S-SGKATGDETGAKVERADGYEPPVQESV-----
>545210000_Equus
HFRPFGLSSVMAVGKNKRLTKGGKKGAKKKVVDPFSSKKDWYDVKAPAMF
NIRNIGKTLVTRTQGTKIASDGLKGRVFEVSLADLQND---EVAFRKFKL
ITEDVQGKNCNTNFHGMDLTRDKMCSMVKKWQTMIEAHVDVKTDDGYLLR
LFCVGFTEKKRNNQIRKTSYAQHQQVRQIRKKMMEIMTREVQTNDLKEVVN
KLIPDSIGKDIEKACQSIYPLHDVFVRKVKMLKKPKFELGKLMELHGEFS
S-SGKATGDETGAKVERADGYEPPVQESV-----
>296470536_Bos
-----MAVGKNKCLTKGGKKGAKKKVVDPFSSKKDWYDVKAPAMF
NIRNIGKTSVTRTQGTKIATSDGLKGRVFEVSLADLQND---EVAFRKFKL
ITEDVQGKNCNTNFHGMDLTRDKMCSMVKKWQTMIEAHVDVKTDDGYLLR
LFCVGFTEKKRNNQIRKTSYAQHQQVRQIRKKMMEIMTREVQTNDLKEVVN
KLIPDSIGKDIEKACQSIYPFHDVFVRKVKMLKKPKFELGKLMELHGEFS
S-SGKATGDETGAKVERADGYEPPVQESV-----
>8394221_Rattus
-----MAVGKNKRLTKGGKKGAKKKVVDPFSSKKDWYDVKAPAMF
NIRNIGKTLVTRTQGTKIASDGLKGRVFEVSLADLQND---EVAFRKFKL
ITEDVQGKNCNTNFHGMDLTRDKMCSMVKKWQTMIEAHVDVKTDDGYLLR
LFCVGFTEKKRNNQIRKTSYAQHQQVRQIRKKMMEIMTREVQTNDLKEVVN
KLIPDSIGKDIEKACQSIYPLHDVFVRKVKMLKKPKFELGKLMELHGEFS
S-SGKTTGDETGAKVERADGYEPPVQESV-----
>545557812_Canis
-----MVVGKNKRLTKGGRKGAKKKVVDPFSSKKDWYDVKAPAMF
NIRNIGKTLVTRTQGTKIASDGLKGRVFEVSLADLQND---EVAFRKFKL
ITEDVQGKNCNTNFHDVLDLTRDKMCSMVKKWQTMIEAHVDVKTDDGYLLH
LFCVGFTEKKRNNQIRKTSYAQHQQVRQIRKKMMEIMTREVQTNDLKEVVN
KLIPDSIGKDIEKACQSIYPLHDVFVRKVKMLKKPKFELGKLMELHGEFS
S-SGKAMGDETGAKVERADGYKPPVQESV-----
>212549625_Sus
-----MAVGKNKRLTKGGKKGAKKKVVDPFSSKRDWYDVKAPAMF
NIRNIGKTLVTRTQGTKIASDGLKGRVFEVSPADLQND---EVAFRKSKL
ITEDVQGKNCNTNFHGMDLTRDKMCSMVKKWQTVIEAHVDVKTDDGYLLR
LFCVGFTEKKRNNQIRKTSYAQHQQVRQIRKKMMEIMTREVQTNDLKEVVN
KLIPDSIGKDIEKACQPIYPLHDVFVRKVKMLKKPKFELGKLMELHGEFS
S-SGKATGDETGAKVERADGYEPPVQESV-----
>17864162_Drosophila
-----MAVGKNKGLSKGGKGGKGGKVVVDPFSSKRDWYDVKAPNMF
QTRQIGKTLVNRTQGGRIASDYLGKRVFEVSLADLQKIDPERSFRKFRL
IAEDVQDRNVLCNFHGMDLTDDKYRSMVKKWQTLIEAIVEAKTVDGYLLR
VFCIGFTAQDQSQSRKTCYAQQSQVRKIRARMTDIIITNEVSGADLKQLVN
KLALDSIAKDIEKSCQRIYPLHDVYIRKVKVLKPKRFDVSKLLELHGDGG
GKSVEAVVSSEGAVIDRPEGYEPPVQEA-----
>17553700_Caenorhabditis
-----MAVGKNN-NKMGKGGKGGKKAVDPFSSRKEWYDIKAPNMF
NTRVQVGTTLINRTQGTKIASDGLKGRVFEVSLGDLNNS---EADFRKFKL
IAEDVQGNVLTNFHAMSMTDKLCSIVKKWHTLIEANTAVKTDDGYTLR
VFVIAFTKKSQVQVKTSTYTKTSKIRKIRSEMIGCIEKEVTGCDLKEVVS
KLIPDSIGKDIEKTCSKLYPLQEVYIRKVKIIRKPKVDLGRLLHDLHGDSI
T-----VGADGEKVDPRDDYEPVQEV-----
>15236171_Arabidopsis
```

```

-----MAVGKNKRISK-GRKGGKKKAVDPFSSKDWYDVKAPGSF
TNRNVGKTLVSRQTQGTKIASSEGLKHRVFEVSLADLQND-EDNAYRKIRL
RAEDVQGRNVLTQFWGMDFTTDKLRSLVKKWQTLIEAHVDVKTDDGYTLR
MFCIAFTKRRANQVKRTC YAQSSQIRQIRKRMSEIMVKEASSCDLKELVA
KFIPEAIGREIEKATQGIYPLQNVFIRKVKILKAPKFDLGLMEVHGDT
A-----EDVGKVDPRP-ADETMVEEPTTEIIGA
>6323474 Saccharomyces
-----MAVGKNKRISK-GKKGQKKRVDPFTRKEWFDIKAPSTF
ENRNVGKTLVSKSTGLKASDALKGRVVEVCLADLQGS-EDHSFRKIKL
RVDEVQGNLLTNFHGMDFTTDKLRSMVRKWQTLIEANVTVKTSDDYVLR
IFAIATFRKANQVSRHSYAQSSHIRAIRKVI SEILTKEVQGSTLAQLTS
KLIPEVINKEIENATKDI FPLQNIHVRKVKLLKQPKFDVGALMALHGE
G-----EEKGK---KVTGFKDEVLETV-----

```

## References

1. Anger AM, Armache JP, Berninghausen O, Habeck M, Subklewe M, Wilson DN, Beckmann R. Structures of the human and Drosophila 80S ribosome. *Nature* 2013; 497:80-5.
2. Lukavsky PJ, Kim I, Otto GA, Puglisi JD. Structure of HCV IRES domain II determined by NMR. *Nat Struct Biol* 2003; 10:1033-8.
3. Li L, Li C, Sarkar S, Zhang J, Witham S, Zhang Z, Wang L, Smith N, Petukh M, Alexov E. DelPhi: a comprehensive suite for DelPhi software and associated resources. *BMC Biophys* 2012; 5:9.
4. Pettersen EF, Goddard TD, Huang CC, Couch GS, Greenblatt DM, Meng EC, Ferrin TE. UCSF Chimera--a visualization system for exploratory research and analysis. *J Comput Chem* 2004; 25:1605-12.
5. Schuler M, Connell SR, Lescoute A, Giesebrecht J, Dabrowski M, Schroeer B, Mielke T, Penczek PA, Westhof E, Spahn CM. Structure of the ribosome-bound cricket paralysis virus IRES RNA. *Nat Struct Mol Biol* 2006; 13:1092-6.
6. Voorhees RM, Weixlbaumer A, Loakes D, Kelley AC, Ramakrishnan V. Insights into substrate stabilization from snapshots of the peptidyl transferase center of the intact 70S ribosome. *Nat Struct Mol Biol* 2009; 16:528-33.
7. Armache JP, Jarasch A, Anger AM, Villa E, Becker T, Bhushan S, Jossinet F, Habeck M, Dindar G, Franckenberg S, et al. Localization of eukaryote-specific ribosomal proteins in a 5.5-A cryo-EM map of the 80S eukaryotic ribosome. *Proc Natl Acad Sci U S A* 2010; 107:19754-9.
8. Lomakin IB, Steitz TA. The initiation of mammalian protein synthesis and mRNA scanning mechanism. *Nature* 2013; 500:307-11.
9. Bulkley D, Innis CA, Blaha G, Steitz TA. Revisiting the structures of several antibiotics bound to the bacterial ribosome. *Proc Natl Acad Sci U S A* 2010; 107:17158-63.
10. Berry KE, Waghray S, Mortimer SA, Bai Y, Doudna JA. Crystal structure of the HCV IRES central domain reveals strategy for start-codon positioning. *Structure* 2011; 19:1456-66.
11. Terribilini M, Sander JD, Lee JH, Zaback P, Jernigan RL, Honavar V, Dobbs D. RNABindR: a server for analyzing and predicting RNA-binding sites in proteins. *Nucleic Acids Res* 2007; 35:W578-84.
12. Wang L, Huang C, Yang MQ, Yang JY. BindN+ for accurate prediction of DNA and RNA-binding residues from protein sequence features. *BMC Syst Biol* 2010; 4 Suppl 1:S3.
13. van Aalten DM, DiRusso CC, Knudsen J. The structural basis of acyl coenzyme A-dependent regulation of the transcription factor FadR. *Embo J* 2001; 20:2041-50.

14. Smith C, Heyne S, Richter AS, Will S, Backofen R. Freiburg RNA Tools: a web server integrating INTARNA, EXPARNA and LOCARNA. *Nucleic Acids Res* 2010; 38:W373-7.
15. Holm L, Kaariainen S, Rosenstrom P, Schenkel A. Searching protein structure databases with DaliLite v.3. *Bioinformatics* 2008; 24:2780-1.
16. Shen MY, Sali A. Statistical potential for assessment and prediction of protein structures. *Protein Sci* 2006; 15:2507-24.
